# Supplementary material for: Variability in the carbon isotope fractionation of trichloroethene on its reductive dechlorination by vitamin B12
Source: Royal Society of Chemistry journal article supplement (doi:10.1039/c4em00040d), 2014-01-01
Supplement: c4em00040d1.pdf [file c4em00040d1.pdf]

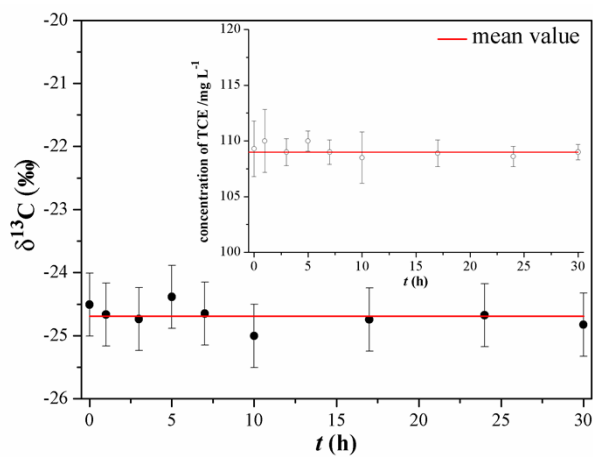

Fig. 1 Trichloroethylene (TCE) carbon isotopic composition ( $\delta^{13}\text{C}$ ) and concentration versus time ( $t$ ) in the *Control* experiment
